# Supplementary material for: Evaluation of mobile real-time polymerase chain reaction tests for the detection of severe acute respiratory syndrome coronavirus 2
Source: PubMed Central journal article supplement (PMC8087814; doi:10.1038/s41598-021-88625-6), 2021-04-30
Supplement: 41598_2021_88625_MOESM1_ESM.pdf [file 41598_2021_88625_MOESM1_ESM.pdf]

## Evaluation of Mobile Real-Time Polymerase Chain Reaction Tests for the Detection of Severe Acute Respiratory Syndrome Coronavirus 2

Chukwunonso Onyilagha<sup>1\*</sup>, Henna Mistry<sup>2\*</sup>, Peter Marszal<sup>1</sup>, Mathieu Pinette<sup>1</sup>, Darwyn Kobasa<sup>4,6</sup>, Nikesh Tailor<sup>4</sup>, Yohannes Berhane<sup>1</sup>, Charles Nfon<sup>1</sup>, Bradley Pickering<sup>1</sup>, Samira Mubareka<sup>2</sup>, David Bulir<sup>3</sup>, Sylvia Chong<sup>3</sup>, Robert Kozak<sup>2#</sup> & Aruna Ambagala<sup>1,5</sup>

**Supplementary Table 1A**

| Sample ID | Biomeme SARS-CoV-2 assay Ct values |        |       |       | BD Max 5'UTR assay Ct values |       |        |        |
|-----------|------------------------------------|--------|-------|-------|------------------------------|-------|--------|--------|
|           | Results                            | Orf1ab | Spike | RPC   | Result                       | 5'UTR | E gene | RNaseP |
| 03806*    | ?                                  | No Ct* | 35.11 | 23.31 | POS                          | 35.09 | 35.91  | 24.49  |
| 03821     | POS                                | 17.48  | 14.33 | No Ct | POS                          | 14.84 | 12.01  | 24.16  |
| 42356     | POS                                | 28.06  | 25.68 | 28.14 | POS                          | 26.12 | 22.83  | 23.71  |
| 07331     | NEG                                | No Ct  | No Ct | 28.06 | NEG                          | No Ct | No Ct  | 25.82  |
| 01241     | NEG                                | No Ct  | No Ct | 28.76 | NEG                          | No Ct | No Ct  | 25.96  |
| 42404     | POS                                | 29.56  | 25.77 | 41.54 | POS                          | 23.97 | 21.94  | 23.94  |
| 42401     | POS                                | 30.72  | 26.02 | 27.73 | POS                          | 21.9  | No Ct  | No Ct  |
| 09451     | NEG                                | No Ct  | No Ct | 29.39 | NEG                          | No Ct | No Ct  | 23.75  |
| 08761     | NEG                                | No Ct  | No Ct | 28.44 | NEG                          | No Ct | No Ct  | 28.22  |
| 42408     | POS                                | 27.31  | 25.15 | 29.46 | POS                          | 22.91 | 20.13  | 26.40  |
| 42403     | POS                                | 22.89  | 21.76 | 28.52 | POS                          | 21.36 | 18.87  | 25.62  |
| 03886     | POS                                | 27.05  | 24.83 | 28.10 | POS                          | 24.16 | 21.70  | 25.64  |
| 04179     | NEG                                | No Ct  | No Ct | 29.00 | NEG                          | No Ct | No Ct  | 24.97  |
| 09281     | NEG                                | No Ct  | No Ct | 28.82 | NEG                          | No Ct | No Ct  | 25.12  |
| 02186     | NEG                                | No Ct  | No Ct | 28.28 | NEG                          | No Ct | No Ct  | 25.11  |
| 42447     | POS                                | 34.26  | 28.55 | 27.67 | POS                          | 27.06 | 25.38  | 27.09  |
| 07387     | NEG                                | No Ct  | No Ct | 29.93 | NEG                          | No Ct | No Ct  | 26.56  |
| 08888     | NEG                                | No Ct  | No Ct | 28.84 | NEG                          | No Ct | No Ct  | 27.16  |
| 01517     | POS                                | 36.70  | 33.07 | 27.84 | POS                          | 36.15 | 31.53  | 24.14  |
| 00389     | NEG                                | No Ct  | No Ct | 27.91 | NEG                          | No Ct | No Ct  | 23.62  |
| 02190     | NEG                                | No Ct  | No Ct | 27.95 | NEG                          | No Ct | No Ct  | 25.42  |
| 42393     | POS                                | 22.33  | 21.07 | 31.51 | POS                          | 20.36 | 17.34  | 23.84  |
| 42444     | POS                                | 29.36  | 27.94 | 27.69 | POS                          | 34.03 | 31.50  | 22.20  |
| 42247     | POS                                | 27.34  | 26.08 | 27.72 | POS                          | 26.54 | 23.75  | 23.52  |
| 42451     | POS                                | 18.36  | 17.54 | No Ct | POS                          | 17.40 | 14.88  | 24.42  |
| 42563     | POS                                | 31.51  | 27.96 | 27.63 | POS                          | 27.18 | 25.02  | 25.21  |
| 06480     | NEG                                | No Ct  | No Ct | 29.53 | NEG                          | No Ct | No Ct  | 24.65  |
| 00376     | NEG                                | No Ct  | No Ct | 28.99 | NEG                          | No Ct | No Ct  | 29.78  |
| 42540     | POS                                | 30.35  | 27.19 | 27.56 | POS                          | 30.70 | 27.58  | 22.58  |
| 01173     | NEG                                | No Ct  | No Ct | 29.51 | NEG                          | No Ct | No Ct  | 27.01  |
| 02474     | NEG                                | No Ct  | No Ct | 29.22 | NEG                          | No Ct | No Ct  | 26.45  |
| 05772     | NEG                                | No Ct  | No Ct | 28.02 | NEG                          | No Ct | No Ct  | 24.28  |
| 03988     | POS                                | 30.13  | 28.14 | 27.64 | POS                          | 29.50 | 25.83  | 25.20  |

|       |     |       |       |       |     |       |       |       |
|-------|-----|-------|-------|-------|-----|-------|-------|-------|
| 03475 | NEG | No Ct | No Ct | 34.67 | NEG | No Ct | No Ct | 24.27 |
| 42434 | POS | 30.43 | 27.15 | 31.91 | POS | 25.05 | 21.61 | No Ct |
| 09777 | NEG | No Ct | No Ct | 32.05 | NEG | No Ct | No Ct | 24.90 |
| 42645 | POS | 32.56 | 26.34 | 27.70 | POS | 26.7  | No Ct | No Ct |
| 42614 | POS | 29.82 | 26.25 | 28.10 | POS | 29.52 | 25.52 | 23.47 |
| 47770 | NEG | No Ct | No Ct | 28.14 | NEG | No Ct | No Ct | 26.36 |
| 83060 | NEG | No Ct | No Ct | 29.48 | NEG | No Ct | No Ct | 29.96 |
| 50150 | NEG | No Ct | No Ct | 35.15 | NEG | No Ct | No Ct | 26.22 |
| 48940 | NEG | No Ct | No Ct | 29.70 | NEG | No Ct | No Ct | 24.03 |
| 42640 | POS | 34.31 | 29.91 | 27.78 | POS | 29.6  | No Ct | No Ct |
| 42712 | POS | 18.54 | 17.38 | No Ct | POS | 18.49 | 16.58 | 25.12 |
| 42697 | POS | 30.20 | 26.93 | 27.72 | POS | 28.13 | 25.61 | 25.66 |
| 00330 | NEG | No Ct | No Ct | 30.59 | NEG | No Ct | No Ct | 25.90 |
| 07069 | NEG | No Ct | No Ct | 32.02 | NEG | No Ct | No Ct | 31.23 |
| 04259 | NEG | No Ct | No Ct | 29.49 | NEG | No Ct | No Ct | 26.62 |
| 42633 | POS | 26.83 | 25.44 | 29.01 | POS | 27.1  | No Ct | No Ct |
| 49758 | NEG | No Ct | No Ct | 28.78 | NEG | No Ct | No Ct | 24.76 |
| 42782 | POS | 37.88 | 34.09 | 28.04 | POS | 35.34 | 33.24 | 25.00 |
| 42784 | POS | 31.51 | 28.45 | 27.86 | POS | 29.75 | 26.77 | 24.86 |
| 42631 | POS | 22.21 | 20.93 | No Ct | POS | 23.28 | 19.03 | 24.50 |
| 81257 | NEG | No Ct | No Ct | 28.57 | NEG | No Ct | No Ct | 22.47 |
| 47956 | NEG | No Ct | No Ct | 28.57 | NEG | No Ct | No Ct | 25.57 |
| 47955 | NEG | No Ct | No Ct | 29.40 | NEG | No Ct | No Ct | 24.24 |
| 47953 | NEG | No Ct | No Ct | 29.25 | NEG | No Ct | No Ct | 31.53 |
| 01553 | POS | 39.28 | 35.79 | 29.58 | POS | 36.75 | 34.37 | 27.63 |
| 02559 | POS | 35.58 | 31.83 | 28.46 | POS | 31.87 | 30.96 | 28.36 |
| 42809 | POS | 35.99 | 32.71 | 29.09 | POS | 33.48 | 32.61 | 24.27 |
| L0001 | POS | 32.18 | 30.57 | 34.25 | POS | 30.19 | 26.45 | 25.24 |
| L0004 | POS | 20.98 | 20.14 | No Ct | POS | 19.56 | 15.82 | 29.19 |
| L0012 | POS | 26.34 | 25.46 | 31.21 | POS | 28.13 | 25.61 | 25.66 |
| L0013 | POS | 21.75 | 21.02 | No Ct | POS | 21.9  | No Ct | No Ct |
| L0014 | POS | 21.91 | 20.97 | No Ct | POS | 22.8  | No Ct | No Ct |
| L0016 | POS | 22.12 | 20.62 | No Ct | POS | 23.1  | No Ct | No Ct |
| D1020 | POS | No Ct | 37.86 | 32.21 | POS | 20.35 | 19.23 | 26.65 |
| D1026 | POS | 19.10 | 18.50 | No Ct | POS | 17.60 | 15.87 | 24.43 |
| D1002 | POS | 23.25 | 22.08 | No Ct | POS | 22.05 | 18.56 | No Ct |
| D1004 | POS | 29.13 | 28.13 | 32.48 | POS | 28.25 | 24.94 | No Ct |
| D1010 | POS | 25.78 | 24.85 | 31.23 | POS | 25.80 | 22.36 | 25.30 |
| D1011 | POS | 36.30 | 35.16 | 31.24 | POS | 34.37 | 32.99 | 24.52 |
| D1013 | POS | 17.06 | 16.06 | No Ct | POS | 18.34 | 15.92 | No Ct |
| D1021 | POS | 23.26 | 22.33 | No Ct | POS | 23.86 | 21.34 | 24.51 |
| D1022 | POS | 29.36 | 28.44 | 31.18 | POS | 29.59 | 25.17 | 29.75 |
| D1025 | POS | 29.08 | 28.19 | 30.89 | POS | 31.06 | 27.76 | 26.62 |
| M0002 | POS | 22.09 | 21.04 | No Ct | POS | 21.02 | 18.66 | No Ct |
| M0006 | POS | 27.56 | 26.54 | 32.13 | POS | 29.5  | No Ct | No Ct |
| M0015 | POS | 29.83 | 29.08 | 31.98 | POS | 29.28 | 26.85 | 26.30 |
| M0018 | POS | 20.34 | 19.62 | No Ct | POS | 20.17 | 17.20 | 25.08 |
| RM001 | NEG | No Ct | No Ct | 31.70 | NEG | No Ct | No Ct | No Ct |
| MG001 | NEG | No Ct | No Ct | 33.34 | NEG | No Ct | No Ct | No Ct |
| JS001 | NEG | No Ct | No Ct | 33.19 | NEG | No Ct | No Ct | No Ct |

|              |     |       |       |       |     |       |       |       |
|--------------|-----|-------|-------|-------|-----|-------|-------|-------|
| <b>MA001</b> | NEG | No Ct | No Ct | 31.19 | NEG | No Ct | No Ct | No Ct |
| <b>NS001</b> | NEG | No Ct | No Ct | 31.01 | NEG | No Ct | No Ct | No Ct |
| <b>SL001</b> | NEG | No Ct | No Ct | 32.03 | NEG | No Ct | No Ct | No Ct |
| <b>VW001</b> | NEG | No Ct | No Ct | 31.86 | NEG | No Ct | No Ct | No Ct |
| <b>TN001</b> | NEG | No Ct | No Ct | 30.53 | NEG | No Ct | No Ct | No Ct |
| <b>VM001</b> | NEG | No Ct | No Ct | 31.23 | NEG | No Ct | No Ct | No Ct |
| <b>LA001</b> | NEG | No Ct | No Ct | 32.05 | NEG | No Ct | No Ct | No Ct |

**Supplementary Table 1B**

| Sample ID    | Precision Biomonitoring TripleLock SARS-CoV-2 assay |        |       |         | CDC EUA assay Ct values |        |        |        |
|--------------|-----------------------------------------------------|--------|-------|---------|-------------------------|--------|--------|--------|
|              | Result                                              | E Gene | UTR   | RNase P | Result                  | E gene | N gene | RNaseP |
| <b>24046</b> | POS                                                 | 28.8   | 32.53 | 22.36   | POS                     | 35.02  | 36.35  | 22.49  |
| <b>28902</b> | POS                                                 | 30.14  | 32.46 | 25.12   | POS                     | 33.71  | 35.47  | 24.86  |
| <b>17891</b> | NEG                                                 | No Ct  | No Ct | 29.09   | NEG                     | No Ct  | No Ct  | 28.84  |
| <b>25598</b> | POS                                                 | 23.95  | 27.43 | 24.97   | POS                     | 27.96  | 29.29  | 26.45  |
| <b>17790</b> | NEG                                                 | No Ct  | No Ct | 23.17   | NEG                     | No Ct  | No Ct  | 23.17  |
| <b>25409</b> | POS                                                 | 24.09  | 27.42 | 24.12   | POS                     | 26.53  | 28.18  | 24.39  |
| <b>26037</b> | POS                                                 | 27.15  | 30.44 | 27.14   | POS                     | 27.99  | 29.74  | 26.39  |
| <b>25631</b> | POS                                                 | 28.01  | 33.51 | 26.11   | POS                     | 31.09  | 32.8   | 26.13  |
| <b>41548</b> | NEG                                                 | No Ct  | No Ct | 26.1    | NEG                     | No Ct  | No Ct  | 27.51  |
| <b>17849</b> | NEG                                                 | No Ct  | No Ct | 26.23   | NEG                     | No Ct  | No Ct  | 25.66  |
| <b>17996</b> | NEG                                                 | No Ct  | No Ct | 29.02   | NEG                     | No Ct  | No Ct  | 25.3   |
| <b>23896</b> | POS                                                 | 31.86  | 34.95 | 26.22   | POS                     | 34.8   | 37.01  | 24.93  |
| <b>26601</b> | POS                                                 | 28.58  | 33.09 | 23.31   | POS                     | 32.12  | 34.02  | 23.64  |
| <b>39659</b> | NEG                                                 | No Ct  | No Ct | 26.1    | NEG                     | No Ct  | No Ct  | 25.04  |
| <b>12149</b> | POS                                                 | 28.93  | 31.85 | 26.14   | POS                     | 31.8   | 33.76  | 25.06  |
| <b>25335</b> | POS                                                 | 28.06  | 31.22 | 26.18   | POS                     | 31.24  | 33.61  | 25.13  |
| <b>17301</b> | NEG                                                 | No Ct  | No Ct | 23.28   | NEG                     | No Ct  | No Ct  | 22.4   |
| <b>40875</b> | NEG                                                 | No Ct  | No Ct | 23.17   | NEG                     | No Ct  | No Ct  | 24.18  |
| <b>27084</b> | POS                                                 | 26.77  | 31.09 | 25.69   | POS                     | 29.17  | 31.18  | 23.9   |
| <b>41067</b> | NEG                                                 | No Ct  | No Ct | 24.07   | NEG                     | No Ct  | No Ct  | 27.17  |
| <b>17697</b> | NEG                                                 | No Ct  | No Ct | 33.47   | NEG                     | No Ct  | No Ct  | 31.13  |
| <b>24031</b> | POS                                                 | 31.16  | 34.83 | 28.04   | POS                     | 33.73  | 35.87  | 27.96  |
| <b>25185</b> | POS                                                 | 23.77  | 28.6  | 26.08   | POS                     | 26.61  | 28.11  | 25.09  |
| <b>28703</b> | POS                                                 | 33.19  | 38.26 | 31.92   | POS                     | 28.76  | 30.55  | 26.52  |
| <b>28815</b> | POS                                                 | 32.85  | 35.88 | 26.27   | POS                     | 36.16  | 38.47  | 24.39  |
| <b>26140</b> | POS                                                 | 20.1   | 21.01 | 23.89   | POS                     | 18.71  | 19.58  | 24.42  |
| <b>25580</b> | POS                                                 | 21.02  | 23.86 | 24.11   | POS                     | 22.32  | 23.65  | 25.35  |
| <b>46342</b> | NEG                                                 | No Ct  | No Ct | 28.2    | NEG                     | No Ct  | No Ct  | 26.39  |

|       |     |       |       |       |     |       |       |       |
|-------|-----|-------|-------|-------|-----|-------|-------|-------|
| 48456 | NEG | No Ct | No Ct | 21.19 | NEG | No Ct | No Ct | 22.09 |
| 42628 | POS | 28.98 | 31.11 | 29.07 | POS | 31.41 | 33.47 | 29.58 |
| 46630 | NEG | No Ct | No Ct | 25.19 | NEG | No Ct | No Ct | 25.16 |
| 38958 | POS | 23.03 | 26.11 | 23.14 | POS | 22.75 | 24.14 | 23.24 |
| 28223 | POS | 26.79 | 29.22 | 25.2  | POS | 22.41 | 24.06 | 24.68 |
| 48400 | NEG | No Ct | No Ct | 26.37 | NEG | No Ct | No Ct | 23.77 |
| 41536 | POS | 23.03 | 26.31 | 29.77 | POS | 24.01 | 25.31 | 28.58 |
| 46975 | NEG | No Ct | No Ct | 22.21 | NEG | No Ct | No Ct | 22.13 |
| 47251 | NEG | No Ct | No Ct | 27.19 | NEG | No Ct | No Ct | 25.93 |
| 45099 | NEG | No Ct | No Ct | 30.07 | NEG | No Ct | No Ct | 27.56 |
| 35042 | POS | 16.2  | 18.98 | 25.67 | POS | 17.99 | 18.72 | 24.27 |
| 41066 | NEG | No Ct | No Ct | 26.09 | NEG | No Ct | No Ct | 24.75 |
| 44934 | NEG | No Ct | No Ct | 27.16 | NEG | No Ct | No Ct | 25.26 |
| 18598 | NEG | No Ct | No Ct | 26.06 | NEG | No Ct | No Ct | 25.7  |
| 34664 | POS | 16.19 | 19.28 | 21.25 | POS | 17.49 | 18.16 | 22.68 |
| 40492 | POS | 22.18 | 25.34 | 25.23 | POS | 23.49 | 24.52 | 25.83 |
| 43148 | POS | 32.89 | 31    | 24.26 | POS | 32.36 | 34.08 | 24.06 |
| 17937 | NEG | No Ct | No Ct | 27.04 | NEG | No Ct | No Ct | 25.97 |
| 47121 | NEG | No Ct | No Ct | 24.19 | NEG | No Ct | No Ct | 23.3  |
| 42731 | NEG | No Ct | No Ct | 32.02 | NEG | No Ct | No Ct | 29.75 |
| 43254 | POS | 30.39 | 31.86 | 24.3  | POS | 32.89 | 34.48 | 23.17 |
| 42629 | POS | 25.96 | 30.06 | 25.18 | POS | 25.39 | 26.96 | 25.06 |
| 42653 | NEG | No Ct | No Ct | 24.12 | NEG | No Ct | No Ct | 24.03 |
| 22328 | NEG | 41.07 | No Ct | 29.08 | NEG | No Ct | No Ct | 27.03 |
| 18454 | NEG | 41.81 | No Ct | 32.21 | NEG | No Ct | No Ct | 30.38 |
| 39778 | NEG | No Ct | No Ct | 28.12 | NEG | No Ct | No Ct | 25.59 |
| 35286 | POS | 27.02 | 30.03 | 26.26 | POS | 24.1  | 25.41 | 25.71 |
| 37217 | POS | 16.06 | 19.17 | 23.16 | POS | 17.75 | 18.3  | 23.24 |
| 39323 | NEG | No Ct | No Ct | 24.31 | NEG | No Ct | No Ct | 23.11 |
| 40949 | POS | 24.86 | 28.73 | 28.72 | POS | 26.51 | 28.16 | 28.27 |
| 17468 | NEG | No Ct | No Ct | 26.15 | NEG | No Ct | No Ct | 25.45 |
| 17938 | NEG | No Ct | No Ct | 29.14 | NEG | No Ct | No Ct | 29.69 |
| 17532 | NEG | No Ct | No Ct | 26.33 | NEG | No Ct | No Ct | 24.81 |
| 42100 | NEG | No Ct | No Ct | 26.26 | NEG | No Ct | No Ct | 24.81 |
| 40648 | NEG | No Ct | No Ct | 23.28 | NEG | No Ct | No Ct | 23.12 |
| 26982 | POS | 29    | 33.44 | 27.21 | POS | 32.59 | 34.73 | 26.54 |
| 23982 | POS | 18.09 | 21.36 | 22.96 | POS | 20.6  | 21.8  | 23.92 |
| 30149 | POS | 22.1  | 25.93 | 25.09 | POS | 21.59 | 22.78 | 25.28 |
| 17472 | NEG | No Ct | No Ct | 32.03 | NEG | No Ct | No Ct | 30.27 |

**Supplementary Table 1C**

| Sample ID          | Precision Biomonitoring TripleLock SARS-CoV-2 assay |       |                |        | BD Max 5'UTR assay Ct values |       |        |        |
|--------------------|-----------------------------------------------------|-------|----------------|--------|------------------------------|-------|--------|--------|
|                    | Result                                              | 5'UTR | E gene         | RNaseP | Result                       | 5'UTR | E gene | RNaseP |
| 03806              | POS                                                 | 31.82 | 30.48          | 25.20  | POS                          | 35.09 | 35.91  | 24.49  |
| 03821              | POS                                                 | 16.17 | 13.30          | 39.58  | POS                          | 14.84 | 12.01  | 24.16  |
| 42356              | POS                                                 | 27.08 | 24.00          | 25.05  | POS                          | 26.12 | 22.83  | 23.71  |
| 07331              | NEG                                                 | No Ct | No Ct          | 28.15  | NEG                          | No Ct | No Ct  | 25.82  |
| 01241              | NEG                                                 | No Ct | No Ct          | 30.08  | NEG                          | No Ct | No Ct  | 25.96  |
| 42404              | POS                                                 | 29.77 | 28.21          | 24.01  | POS                          | 23.97 | 21.94  | 23.94  |
| 42401              | POS                                                 | 29.15 | 25.15          | 27.15  | POS                          | 21.9  | No Ct  | No Ct  |
| 09451              | NEG                                                 | No Ct | No Ct          | 29.01  | NEG                          | No Ct | No Ct  | 23.75  |
| 08761              | NEG                                                 | No Ct | No Ct          | 30.96  | NEG                          | No Ct | No Ct  | 28.22  |
| 42408              | POS                                                 | 29.96 | 25.17          | 27.30  | POS                          | 22.91 | 20.13  | 26.40  |
| 42403              | POS                                                 | 23.98 | 21.22          | 26.12  | POS                          | 21.36 | 18.87  | 25.62  |
| 03886              | POS                                                 | 29.11 | 25.04          | 28.08  | POS                          | 24.16 | 21.70  | 25.64  |
| 04179              | NEG                                                 | No Ct | No Ct          | 29.21  | NEG                          | No Ct | No Ct  | 24.97  |
| 09281              | NEG                                                 | No Ct | No Ct          | 30.02  | NEG                          | No Ct | No Ct  | 25.12  |
| 02186              | NEG                                                 | No Ct | No Ct          | 30.13  | NEG                          | No Ct | No Ct  | 25.11  |
| 42447              | POS                                                 | 30.08 | 27.23          | 29.24  | POS                          | 27.06 | 25.38  | 27.09  |
| 07387              | NEG                                                 | No Ct | No Ct          | 30.15  | NEG                          | No Ct | No Ct  | 26.56  |
| 08888              | NEG                                                 | No Ct | No Ct          | 29.18  | NEG                          | No Ct | No Ct  | 27.16  |
| 01517              | POS                                                 | 33.90 | 30.20          | 24.26  | POS                          | 36.15 | 31.53  | 24.14  |
| 00389              | NEG                                                 | No Ct | No Ct          | 27.12  | NEG                          | No Ct | No Ct  | 23.62  |
| 02190              | NEG                                                 | No Ct | No Ct          | 29.08  | NEG                          | No Ct | No Ct  | 25.42  |
| 42393              | POS                                                 | 24.10 | 20.18          | 27.26  | POS                          | 20.36 | 17.34  | 23.84  |
| 42444              | POS                                                 | 29.36 | 26.90          | 22.26  | POS                          | 34.03 | 31.50  | 22.20  |
| 42247              | POS                                                 | 28.34 | 24.62          | 25.07  | POS                          | 26.54 | 23.75  | 23.52  |
| 42451              | POS                                                 | 21.13 | 17.20          | 35.89  | POS                          | 17.40 | 14.88  | 24.42  |
| 42563              | POS                                                 | 30.01 | 27.01          | 26.90  | POS                          | 27.18 | 25.02  | 25.21  |
| 06480              | NEG                                                 | No Ct | No Ct          | 28.08  | NEG                          | No Ct | No Ct  | 24.65  |
| 00376              | NEG                                                 | No Ct | No Ct          | 31.12  | NEG                          | No Ct | No Ct  | 29.78  |
| 42540              | POS                                                 | 28.35 | 25.41          | 23.27  | POS                          | 30.70 | 27.58  | 22.58  |
| 01173 <sup>#</sup> | NEG                                                 | No Ct | 0 <sup>#</sup> | 30.30  | NEG                          | No Ct | No Ct  | 27.01  |
| 02474              | NEG                                                 | No Ct | No Ct          | 31.04  | NEG                          | No Ct | No Ct  | 26.45  |
| 05772              | NEG                                                 | No Ct | No Ct          | 27.15  | NEG                          | No Ct | No Ct  | 24.28  |
| 03988              | POS                                                 | 31.20 | 26.85          | 26.04  | POS                          | 29.50 | 25.83  | 25.20  |
| 03475              | NEG                                                 | No Ct | No Ct          | 29.15  | NEG                          | No Ct | No Ct  | 24.27  |
| 42434              | POS                                                 | 35.22 | 30.20          | 26.87  | POS                          | 25.05 | 21.61  | No Ct  |
| 09777              | NEG                                                 | No Ct | No Ct          | 29.07  | NEG                          | No Ct | No Ct  | 24.90  |
| 42645              | POS                                                 | 28.36 | 25.10          | 25.12  | POS                          | 26.7  | No Ct  | No Ct  |
| 42614              | POS                                                 | 29.99 | 25.87          | 24.16  | POS                          | 29.52 | 25.52  | 23.47  |
| 47770              | NEG                                                 | No Ct | No Ct          | 29.13  | NEG                          | No Ct | No Ct  | 26.36  |
| 83060              | NEG                                                 | No Ct | No Ct          | 29.47  | NEG                          | No Ct | No Ct  | 29.96  |
| 50150              | NEG                                                 | No Ct | No Ct          | 30.93  | NEG                          | No Ct | No Ct  | 26.22  |

|              |     |       |       |       |     |       |       |       |
|--------------|-----|-------|-------|-------|-----|-------|-------|-------|
| <b>48940</b> | NEG | No Ct | No Ct | 29.97 | NEG | No Ct | No Ct | 24.03 |
| <b>42640</b> | POS | 30.66 | 28.21 | 27.18 | POS | 29.6  | No Ct | No Ct |
| <b>42712</b> | POS | 20.15 | 17.15 | 25.44 | POS | 18.49 | 16.58 | 25.12 |
| <b>42697</b> | POS | 28.09 | 25.14 | 25.19 | POS | 28.13 | 25.61 | 25.66 |
| <b>00330</b> | NEG | No Ct | No Ct | 29.19 | NEG | No Ct | No Ct | 25.90 |
| <b>07069</b> | NEG | No Ct | No Ct | 31.14 | NEG | No Ct | No Ct | 31.23 |
| <b>04259</b> | NEG | No Ct | No Ct | 31.05 | NEG | No Ct | No Ct | 26.62 |
| <b>42633</b> | POS | 29.17 | 25.20 | 27.14 | POS | 27.1  | No Ct | No Ct |
| <b>49758</b> | NEG | No Ct | No Ct | 30.26 | NEG | No Ct | No Ct | 24.76 |
| <b>42782</b> | POS | 35.36 | 33.04 | 29.16 | POS | 35.34 | 33.24 | 25.00 |
| <b>42784</b> | POS | 30.62 | 27.30 | 27.18 | POS | 29.75 | 26.77 | 24.86 |
| <b>42631</b> | POS | 24.18 | 20.09 | 27.17 | POS | 23.28 | 19.03 | 24.50 |
| <b>81257</b> | NEG | No Ct | No Ct | 27.05 | NEG | No Ct | No Ct | 22.47 |
| <b>47956</b> | NEG | No Ct | No Ct | 29.17 | NEG | No Ct | No Ct | 25.57 |
| <b>47955</b> | NEG | No Ct | No Ct | 30.13 | NEG | No Ct | No Ct | 24.24 |
| <b>47953</b> | NEG | No Ct | No Ct | 31.01 | NEG | No Ct | No Ct | 31.53 |
| <b>01553</b> | POS | 35.69 | 33.51 | 29.20 | POS | 36.75 | 34.37 | 27.63 |
| <b>02559</b> | POS | 33.91 | 31.26 | 31.10 | POS | 31.87 | 30.96 | 28.36 |
| <b>42809</b> | POS | 35.32 | 31.66 | 27.09 | POS | 33.48 | 32.61 | 24.27 |

\* Inconclusive

#Does not cross 500RFU threshold, adjusted to 0.

Clinical samples with only UTR Ct were run on the BD Max.

Clinical samples with UTR, E gene, and RNaseP were run on Rotor gene Q or CFX96.
